# Supplementary material
Source: HighWire-hosted journal article supplement (https://ijgc.bmj.com/content/ijgc-2020-001288)
Supplement: inline-supplementary-material-1 [file inline-supplementary-material-1.pdf]

## Manage wisely: poly (ADP-ribose) polymerase inhibitor (PARPi) treatment and adverse events

Ainhoa Madariaga, Valerie Bowering, Soha Ahrari, Amit M Oza, Stephanie Lheureux

### PARPi have transformed the Treatment Landscape of Ovarian Cancer

Several options in 1<sup>st</sup> & Recurrent setting

#### Selection of Maintenance PARPi

#### PARPi Adverse Events

Class Effect

*Fatigue, Hematologic, Nausea*

Drug Specific

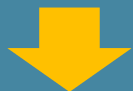

#### Appropriate Management

- ✓ Safety
- ✓ Patient well-being
- ✓ Adequate dose-intensity

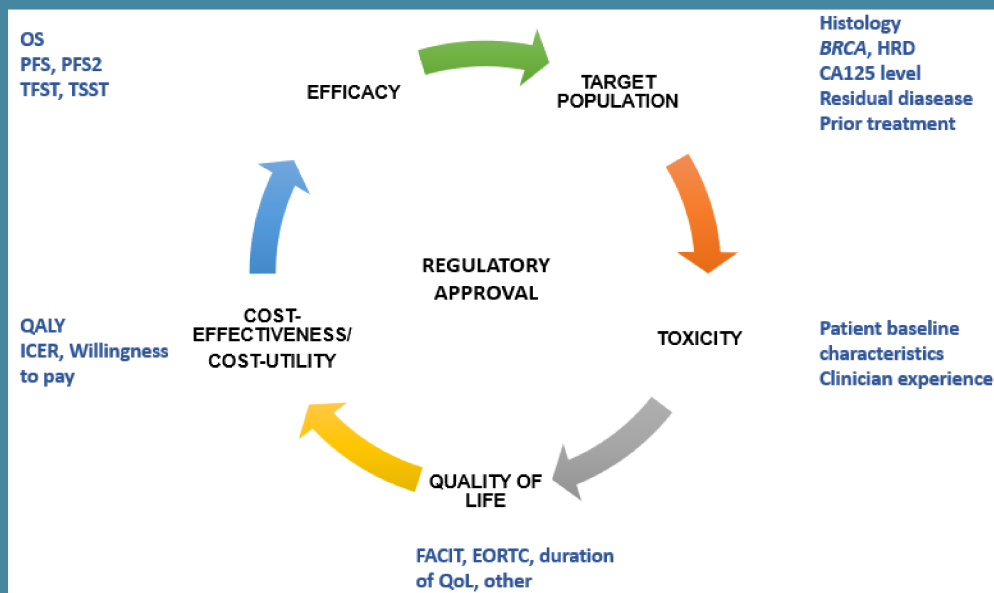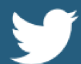

@IJGConline

Full Article Available at:

<http://dx.doi.org/10.1136/ijgc-2020-001288>
